# Supplementary material for: Self-assembled single-crystalline hydrogen-bonded frameworks: a potential metal-free molecule towards proton conductivity and electrochemical detection of organic and inorganic pollutants
Source: Royal Society of Chemistry journal article supplement (doi:10.1039/d4nj05382f), 2025-01-01
Supplement: d4nj05382f1.pdf [file d4nj05382f1.pdf]

## Electronic Supplementary information

### **Self-assembled single-crystalline hydrogen-bonded frameworks: A potential metal-free molecule towards proton conductivity and electrochemical detection of organic and inorganic pollutants**

G. Maheswari,<sup>‡a,b,c</sup> Mari Elanchezian,<sup>‡d</sup> Jonnagaddala Harathi,<sup>‡e</sup> Atchudan Raji,<sup>‡f,g</sup> F. Ashamary,<sup>b,c</sup> Ramalingam Mahaan,<sup>b,h</sup> Pramod K. Kalambate,<sup>i</sup> Hon Man Lee,<sup>\*a</sup> Andreas Rosenkranz,<sup>\*j,k</sup> Devaraj Manoj<sup>\*b,c</sup>

<sup>a</sup>*Department of Department of Chemistry, National Changhua University of Education Changhua 500, Taiwan. (E-mail: [leehm@cc.ncue.edu.tw](mailto:leehm@cc.ncue.edu.tw))*

<sup>b</sup>*Department of Chemistry, Karpagam Academy of Higher Education, Coimbatore- 641 021, India.*

<sup>c</sup>*Centre for Material Chemistry, Karpagam Academy of Higher Education, Coimbatore- 641021, India*

<sup>d</sup>*Department of Chemical and Biochemical Engineering, College of Engineering, Dongguk University-Seoul, 30 Pildong-ro 1-gil, Jung-gu, Seoul 04620, Republic of Korea.*

<sup>e</sup>*Experimental Radiation Oncology, The University of Texas MD Anderson Cancer Center, Houston, Texas-77030, USA.*

<sup>f</sup>*Department of Chemistry, Saveetha School of Engineering, Saveetha Institute of Medical and Technical Sciences, Chennai 602105, Tamil Nadu, India.*

<sup>g</sup>*School of Chemical Engineering, Yeungnam University, Gyeongsan 38541, Republic of Korea.*

<sup>h</sup>*Advanced Materials Chemistry Laboratory, Department of Chemistry, Faculty of Engineering and Technology, SRM Institute of Science and Technology, Kattankulathur, Chengalpattu, Tamil Nadu - 603 203*

<sup>i</sup>*Department of Chemistry & Waterloo Institute for Nanotechnology, University of Waterloo, Waterloo, Ontario, Canada*

<sup>j</sup>*Department for Chemical Engineering, Biotechnology and Materials, University of Chile, Santiago, Chile*

<sup>k</sup>*ANID – Millennium Science Initiative Program, Millennium Nuclei of Advanced MXenes for Sustainable Applications (AMXSA), Santiago, Chile*

<sup>‡</sup> First authors

\* Corresponding authors

**E-mail:** [arosenkranz@ing.uchile.cl](mailto:arosenkranz@ing.uchile.cl)

**E-mail:** [manoj.devaraj@kahedu.edu.in](mailto:manoj.devaraj@kahedu.edu.in)

Table S1. Crystal data and structure refinement for 231097lt\_auto.

|                                   |                                             |                   |
|-----------------------------------|---------------------------------------------|-------------------|
| Identification code               | shelx                                       |                   |
| Empirical formula                 | C42 H36 N10 O19                             |                   |
| Formula weight                    | 984.81                                      |                   |
| Temperature                       | 100(2) K                                    |                   |
| Wavelength                        | 1.54184 Å                                   |                   |
| Crystal system                    | Monoclinic                                  |                   |
| Space group                       | P 21/c                                      |                   |
| Unit cell dimensions              | a = 3.79460(10) Å                           | a = 90°.          |
|                                   | b = 23.1642(4) Å                            | b = 94.7210(10)°. |
|                                   | c = 22.7365(4) Å                            | g = 90°.          |
| Volume                            | 1991.73(7) Å <sup>3</sup>                   |                   |
| Z                                 | 2                                           |                   |
| Density (calculated)              | 1.642 Mg/m <sup>3</sup>                     |                   |
| Absorption coefficient            | 1.135 mm <sup>-1</sup>                      |                   |
| F(000)                            | 1020                                        |                   |
| Crystal size                      | 0.180 x 0.060 x 0.050 mm <sup>3</sup>       |                   |
| Theta range for data collection   | 2.728 to 74.585°.                           |                   |
| Index ranges                      | -4<=h<=4, -27<=k<=28, -27<=l<=27            |                   |
| Reflections collected             | 22566                                       |                   |
| Independent reflections           | 3953 [R(int) = 0.0356]                      |                   |
| Completeness to theta = 67.684°   | 100.0 %                                     |                   |
| Refinement method                 | Full-matrix least-squares on F <sup>2</sup> |                   |
| Data / restraints / parameters    | 3953 / 342 / 440                            |                   |
| Goodness-of-fit on F <sup>2</sup> | 1.050                                       |                   |
| Final R indices [I>2sigma(I)]     | R1 = 0.0386, wR2 = 0.1036                   |                   |
| R indices (all data)              | R1 = 0.0440, wR2 = 0.1072                   |                   |
| Extinction coefficient            | n/a                                         |                   |
| Largest diff. peak and hole       | 0.224 and -0.260 e.Å <sup>-3</sup>          |                   |

Table S2. Atomic coordinates ( $\times 10^4$ ) and equivalent isotropic displacement parameters ( $\text{\AA}^2 \times 10^3$ ) for 231097lt\_auto.  $U(\text{eq})$  is defined as one third of the trace of the orthogonalized  $U^{ij}$  tensor.

|       | x         | y       | z       | U(eq) |
|-------|-----------|---------|---------|-------|
| C(1)  | 1419(4)   | 6929(1) | 5840(1) | 23(1) |
| C(2)  | 531(4)    | 7022(1) | 6412(1) | 26(1) |
| C(3)  | -1227(4)  | 7533(1) | 6516(1) | 28(1) |
| C(4)  | -2050(4)  | 7922(1) | 6062(1) | 28(1) |
| C(5)  | -1081(4)  | 7768(1) | 5508(1) | 26(1) |
| C(6)  | 4488(4)   | 5973(1) | 6053(1) | 25(1) |
| C(7)  | 6168(4)   | 5602(1) | 5714(1) | 25(1) |
| C(8)  | 4325(4)   | 6320(1) | 5140(1) | 23(1) |
| N(2)  | 3303(3)   | 6427(1) | 5686(1) | 22(1) |
| N(3)  | 6043(3)   | 5827(1) | 5149(1) | 25(1) |
| C(9)  | -3362(8)  | 8673(1) | 4962(2) | 30(1) |
| C(10) | -3866(7)  | 8817(1) | 4384(2) | 32(1) |
| C(11) | -1677(9)  | 7943(1) | 4419(1) | 32(1) |
| N(4)  | -1990(16) | 8122(2) | 4980(2) | 26(1) |
| N(5)  | -2825(7)  | 8357(1) | 4058(1) | 32(1) |
| C(39) | -2520(40) | 7993(5) | 4512(6) | 31(1) |
| C(30) | -3660(30) | 8494(6) | 4213(5) | 33(1) |
| C(31) | -2860(30) | 8697(5) | 5168(5) | 31(1) |
| N(34) | -1960(70) | 8126(8) | 5100(6) | 28(1) |
| N(35) | -3810(20) | 8895(4) | 4645(5) | 34(1) |
| C(12) | 9687(4)   | 5140(1) | 2408(1) | 24(1) |
| C(13) | 9198(4)   | 5299(1) | 2989(1) | 24(1) |
| C(14) | 9881(4)   | 5850(1) | 3219(1) | 24(1) |
| C(15) | 11242(4)  | 6270(1) | 2851(1) | 24(1) |
| C(16) | 11809(4)  | 6107(1) | 2277(1) | 24(1) |
| C(17) | 11048(4)  | 5563(1) | 2038(1) | 24(1) |
| C(18) | 8561(4)   | 4519(1) | 2256(1) | 29(1) |
| O(1)  | 8742(4)   | 4335(1) | 1729(1) | 46(1) |
| O(2)  | 7415(4)   | 4216(1) | 2640(1) | 37(1) |
| C(19) | 8900(40)  | 5923(4) | 3831(5) | 29(1) |
| O(3)  | 8364(13)  | 6431(1) | 4034(1) | 49(1) |

|       |            |          |          |       |
|-------|------------|----------|----------|-------|
| O(4)  | 8837(19)   | 5522(3)  | 4193(3)  | 31(1) |
| C(29) | 8810(120)  | 5995(15) | 3883(15) | 26(2) |
| O(23) | 8960(70)   | 5461(10) | 4106(11) | 29(3) |
| O(24) | 6710(30)   | 6398(4)  | 3924(4)  | 34(2) |
| C(20) | 12260(20)  | 6886(3)  | 2975(2)  | 26(1) |
| O(5)  | 11095(8)   | 7142(1)  | 3440(1)  | 32(1) |
| O(6)  | 14010(13)  | 7160(3)  | 2638(3)  | 29(1) |
| C(40) | 12240(70)  | 6893(11) | 3117(7)  | 24(2) |
| O(45) | 12610(30)  | 6998(4)  | 3641(4)  | 38(2) |
| O(46) | 13270(40)  | 7200(10) | 2713(9)  | 31(2) |
| C(21) | 11830(4)   | 5514(1)  | 1390(1)  | 30(1) |
| O(7)  | 11048(4)   | 5045(1)  | 1106(1)  | 51(1) |
| O(8)  | 13128(4)   | 5925(1)  | 1154(1)  | 40(1) |
| N(1)  | 630(3)     | 7287(1)  | 5390(1)  | 23(1) |
| O(29) | 10990(160) | 5105(12) | 38(15)   | 69(5) |
| O(9)  | 13309(18)  | 5081(2)  | -60(2)   | 72(2) |
| O(10) | -3646(4)   | 8258(1)  | 2874(1)  | 41(1) |

---

Table S3. Bond lengths [Å] and angles [°] for 231097lt\_auto.

---

|             |            |
|-------------|------------|
| C(1)-N(1)   | 1.3328(19) |
| C(1)-C(2)   | 1.387(2)   |
| C(1)-N(2)   | 1.4245(19) |
| C(2)-C(3)   | 1.389(2)   |
| C(2)-H(2)   | 0.9500     |
| C(3)-C(4)   | 1.387(2)   |
| C(3)-H(3)   | 0.9500     |
| C(4)-C(5)   | 1.387(2)   |
| C(4)-H(4)   | 0.9500     |
| C(5)-N(34)  | 1.267(15)  |
| C(5)-N(1)   | 1.329(2)   |
| C(5)-N(4)   | 1.470(4)   |
| C(6)-C(7)   | 1.348(2)   |
| C(6)-N(2)   | 1.3916(19) |
| C(6)-H(6)   | 0.9500     |
| C(7)-N(3)   | 1.3838(19) |
| C(7)-H(7)   | 0.9500     |
| C(8)-N(3)   | 1.3143(19) |
| C(8)-N(2)   | 1.3532(18) |
| C(8)-H(8)   | 0.9500     |
| N(3)-H(3A)  | 0.8800     |
| C(9)-C(10)  | 1.355(3)   |
| C(9)-N(4)   | 1.378(4)   |
| C(9)-H(9)   | 0.9500     |
| C(10)-N(5)  | 1.374(3)   |
| C(10)-H(10) | 0.9500     |
| C(11)-N(5)  | 1.314(3)   |
| C(11)-N(4)  | 1.355(4)   |
| C(11)-H(11) | 0.9500     |
| N(5)-H(5A)  | 0.8800     |
| C(39)-N(34) | 1.371(13)  |
| C(39)-C(30) | 1.396(12)  |
| C(39)-H(39) | 0.9500     |
| C(30)-N(35) | 1.356(11)  |

|               |            |
|---------------|------------|
| C(30)-H(30)   | 0.9500     |
| C(31)-N(35)   | 1.297(10)  |
| C(31)-N(34)   | 1.378(15)  |
| C(31)-H(31)   | 0.9500     |
| N(35)-H(35)   | 0.8800     |
| C(12)-C(13)   | 1.398(2)   |
| C(12)-C(17)   | 1.417(2)   |
| C(12)-C(18)   | 1.531(2)   |
| C(13)-C(14)   | 1.394(2)   |
| C(13)-H(13)   | 0.9500     |
| C(14)-C(15)   | 1.409(2)   |
| C(14)-C(19)   | 1.480(11)  |
| C(14)-C(29)   | 1.63(3)    |
| C(15)-C(16)   | 1.391(2)   |
| C(15)-C(20)   | 1.501(8)   |
| C(15)-C(40)   | 1.60(2)    |
| C(16)-C(17)   | 1.394(2)   |
| C(16)-H(16)   | 0.9500     |
| C(17)-C(21)   | 1.531(2)   |
| C(18)-O(2)    | 1.2286(19) |
| C(18)-O(1)    | 1.2788(19) |
| C(19)-O(4)    | 1.240(14)  |
| C(19)-O(3)    | 1.287(10)  |
| C(29)-O(24)   | 1.24(4)    |
| C(29)-O(23)   | 1.34(5)    |
| O(24)-H(24)   | 0.8400     |
| C(20)-O(6)    | 1.229(9)   |
| C(20)-O(5)    | 1.320(6)   |
| O(5)-H(5)     | 0.8400     |
| C(40)-O(45)   | 1.211(17)  |
| C(40)-O(46)   | 1.25(3)    |
| C(21)-O(8)    | 1.217(2)   |
| C(21)-O(7)    | 1.285(2)   |
| O(7)-H(7A)    | 0.8400     |
| O(29)-O(29)#1 | 0.90(10)   |
| O(29)-H(29O)  | 0.8000     |

|                 |            |
|-----------------|------------|
| O(29)-H(29P)    | 0.8000     |
| O(9)-O(9)#2     | 1.344(13)  |
| O(9)-H(9O)      | 0.8001     |
| O(9)-H(9P)      | 0.8000     |
| O(10)-H(10O)    | 0.8000     |
| O(10)-H(10P)    | 0.8001     |
|                 |            |
| N(1)-C(1)-C(2)  | 124.58(14) |
| N(1)-C(1)-N(2)  | 113.87(13) |
| C(2)-C(1)-N(2)  | 121.54(14) |
| C(1)-C(2)-C(3)  | 116.69(15) |
| C(1)-C(2)-H(2)  | 121.7      |
| C(3)-C(2)-H(2)  | 121.7      |
| C(4)-C(3)-C(2)  | 120.60(14) |
| C(4)-C(3)-H(3)  | 119.7      |
| C(2)-C(3)-H(3)  | 119.7      |
| C(5)-C(4)-C(3)  | 116.65(14) |
| C(5)-C(4)-H(4)  | 121.7      |
| C(3)-C(4)-H(4)  | 121.7      |
| N(34)-C(5)-N(1) | 120.3(8)   |
| N(34)-C(5)-C(4) | 115.0(8)   |
| N(1)-C(5)-C(4)  | 124.76(14) |
| N(1)-C(5)-N(4)  | 112.8(2)   |
| C(4)-C(5)-N(4)  | 122.4(2)   |
| C(7)-C(6)-N(2)  | 106.49(13) |
| C(7)-C(6)-H(6)  | 126.8      |
| N(2)-C(6)-H(6)  | 126.8      |
| C(6)-C(7)-N(3)  | 107.98(13) |
| C(6)-C(7)-H(7)  | 126.0      |
| N(3)-C(7)-H(7)  | 126.0      |
| N(3)-C(8)-N(2)  | 108.88(13) |
| N(3)-C(8)-H(8)  | 125.6      |
| N(2)-C(8)-H(8)  | 125.6      |
| C(8)-N(2)-C(6)  | 107.99(12) |
| C(8)-N(2)-C(1)  | 124.21(12) |
| C(6)-N(2)-C(1)  | 127.78(12) |

|                   |            |
|-------------------|------------|
| C(8)-N(3)-C(7)    | 108.66(13) |
| C(8)-N(3)-H(3A)   | 125.7      |
| C(7)-N(3)-H(3A)   | 125.7      |
| C(10)-C(9)-N(4)   | 106.3(2)   |
| C(10)-C(9)-H(9)   | 126.9      |
| N(4)-C(9)-H(9)    | 126.9      |
| C(9)-C(10)-N(5)   | 107.9(2)   |
| C(9)-C(10)-H(10)  | 126.0      |
| N(5)-C(10)-H(10)  | 126.0      |
| N(5)-C(11)-N(4)   | 108.3(3)   |
| N(5)-C(11)-H(11)  | 125.8      |
| N(4)-C(11)-H(11)  | 125.8      |
| C(11)-N(4)-C(9)   | 108.5(3)   |
| C(11)-N(4)-C(5)   | 124.4(3)   |
| C(9)-N(4)-C(5)    | 127.1(3)   |
| C(11)-N(5)-C(10)  | 109.0(2)   |
| C(11)-N(5)-H(5A)  | 125.5      |
| C(10)-N(5)-H(5A)  | 125.5      |
| N(34)-C(39)-C(30) | 107.9(11)  |
| N(34)-C(39)-H(39) | 126.1      |
| C(30)-C(39)-H(39) | 126.1      |
| N(35)-C(30)-C(39) | 104.2(8)   |
| N(35)-C(30)-H(30) | 127.9      |
| C(39)-C(30)-H(30) | 127.9      |
| N(35)-C(31)-N(34) | 106.8(9)   |
| N(35)-C(31)-H(31) | 126.6      |
| N(34)-C(31)-H(31) | 126.6      |
| C(5)-N(34)-C(39)  | 125.3(14)  |
| C(5)-N(34)-C(31)  | 126.8(12)  |
| C(39)-N(34)-C(31) | 107.7(11)  |
| C(31)-N(35)-C(30) | 113.4(8)   |
| C(31)-N(35)-H(35) | 123.3      |
| C(30)-N(35)-H(35) | 123.3      |
| C(13)-C(12)-C(17) | 117.51(14) |
| C(13)-C(12)-C(18) | 113.93(13) |
| C(17)-C(12)-C(18) | 128.55(13) |



|                   |            |
|-------------------|------------|
| C(14)-C(13)-C(12) | 124.13(14) |
| C(14)-C(13)-H(13) | 117.9      |
| C(12)-C(13)-H(13) | 117.9      |
| C(13)-C(14)-C(15) | 118.30(14) |
| C(13)-C(14)-C(19) | 113.8(4)   |
| C(15)-C(14)-C(19) | 127.8(4)   |
| C(13)-C(14)-C(29) | 118.9(13)  |
| C(15)-C(14)-C(29) | 122.7(12)  |
| C(16)-C(15)-C(14) | 117.59(14) |
| C(16)-C(15)-C(20) | 112.1(2)   |
| C(14)-C(15)-C(20) | 130.3(2)   |
| C(16)-C(15)-C(40) | 123.3(7)   |
| C(14)-C(15)-C(40) | 119.0(7)   |
| C(15)-C(16)-C(17) | 124.57(14) |
| C(15)-C(16)-H(16) | 117.7      |
| C(17)-C(16)-H(16) | 117.7      |
| C(16)-C(17)-C(12) | 117.86(14) |
| C(16)-C(17)-C(21) | 113.07(13) |
| C(12)-C(17)-C(21) | 129.07(14) |
| O(2)-C(18)-O(1)   | 121.64(15) |
| O(2)-C(18)-C(12)  | 118.98(14) |
| O(1)-C(18)-C(12)  | 119.36(14) |
| O(4)-C(19)-O(3)   | 115.7(10)  |
| O(4)-C(19)-C(14)  | 123.9(9)   |
| O(3)-C(19)-C(14)  | 120.1(8)   |
| O(24)-C(29)-O(23) | 133(4)     |
| O(24)-C(29)-C(14) | 116(3)     |
| O(23)-C(29)-C(14) | 99(3)      |
| C(29)-O(24)-H(24) | 109.5      |
| O(6)-C(20)-O(5)   | 120.1(6)   |
| O(6)-C(20)-C(15)  | 121.2(5)   |
| O(5)-C(20)-C(15)  | 118.7(5)   |
| C(20)-O(5)-H(5)   | 109.5      |
| O(45)-C(40)-O(46) | 126(2)     |
| O(45)-C(40)-C(15) | 123.9(18)  |
| O(46)-C(40)-C(15) | 108.2(14)  |

|                      |            |
|----------------------|------------|
| O(8)-C(21)-O(7)      | 121.60(15) |
| O(8)-C(21)-C(17)     | 119.01(14) |
| O(7)-C(21)-C(17)     | 119.37(14) |
| C(21)-O(7)-H(7A)     | 109.5      |
| C(5)-N(1)-C(1)       | 116.69(13) |
| O(29)#1-O(29)-H(29O) | 21.0       |
| O(29)#1-O(29)-H(29P) | 116.5      |
| H(29O)-O(29)-H(29P)  | 105.1      |
| O(9)#2-O(9)-H(9O)    | 130.8      |
| O(9)#2-O(9)-H(9P)    | 115.9      |
| H(9O)-O(9)-H(9P)     | 105.1      |
| H(10O)-O(10)-H(10P)  | 105.1      |

---

Symmetry transformations used to generate equivalent atoms:

#1  $-x+2, -y+1, -z$  #2  $-x+3, -y+1, -z$

Table S4. Anisotropic displacement parameters ( $\text{\AA}^2 \times 10^3$ ) for 231097lt\_auto. The anisotropic displacement factor exponent takes the form:  $-2p^2[ h^2 a^2 U^{11} + \dots + 2 h k a^* b^* U^{12} ]$

|       | U11   | U22   | U33   | U23    | U13   | U12    |
|-------|-------|-------|-------|--------|-------|--------|
| C(1)  | 23(1) | 21(1) | 24(1) | -2(1)  | 3(1)  | -4(1)  |
| C(2)  | 26(1) | 29(1) | 22(1) | -2(1)  | 2(1)  | -4(1)  |
| C(3)  | 26(1) | 34(1) | 25(1) | -8(1)  | 5(1)  | -6(1)  |
| C(4)  | 27(1) | 25(1) | 33(1) | -7(1)  | 5(1)  | -1(1)  |
| C(5)  | 26(1) | 21(1) | 30(1) | 1(1)   | 4(1)  | -3(1)  |
| C(6)  | 29(1) | 24(1) | 23(1) | 4(1)   | 4(1)  | -3(1)  |
| C(7)  | 28(1) | 21(1) | 27(1) | 4(1)   | 3(1)  | -2(1)  |
| C(8)  | 25(1) | 23(1) | 19(1) | -1(1)  | 2(1)  | -2(1)  |
| N(2)  | 25(1) | 21(1) | 20(1) | 0(1)   | 3(1)  | -2(1)  |
| N(3)  | 28(1) | 25(1) | 22(1) | -3(1)  | 4(1)  | -1(1)  |
| C(9)  | 43(1) | 25(1) | 22(2) | 2(1)   | 5(1)  | 5(1)   |
| C(10) | 46(1) | 29(1) | 22(2) | 3(1)   | 6(1)  | 6(1)   |
| C(11) | 42(2) | 32(1) | 22(1) | 0(1)   | 8(1)  | 8(1)   |
| N(4)  | 34(1) | 24(1) | 21(2) | 4(1)   | 5(1)  | 2(1)   |
| N(5)  | 47(1) | 30(1) | 21(1) | 2(1)   | 8(1)  | 8(1)   |
| C(39) | 42(2) | 29(2) | 24(2) | 0(2)   | 7(2)  | 7(2)   |
| C(30) | 47(2) | 32(2) | 22(2) | 1(2)   | 6(2)  | 9(2)   |
| C(31) | 43(2) | 27(2) | 22(3) | 4(2)   | 5(2)  | 6(2)   |
| N(34) | 38(2) | 27(2) | 20(3) | -2(2)  | 8(3)  | 4(2)   |
| N(35) | 49(2) | 31(2) | 22(2) | 2(2)   | 5(2)  | 8(2)   |
| C(12) | 27(1) | 22(1) | 21(1) | 0(1)   | 2(1)  | 1(1)   |
| C(13) | 30(1) | 22(1) | 21(1) | 2(1)   | 2(1)  | 0(1)   |
| C(14) | 29(1) | 23(1) | 19(1) | 1(1)   | 0(1)  | 2(1)   |
| C(15) | 26(1) | 21(1) | 24(1) | 1(1)   | 1(1)  | 2(1)   |
| C(16) | 28(1) | 23(1) | 24(1) | 3(1)   | 5(1)  | 0(1)   |
| C(17) | 28(1) | 24(1) | 21(1) | 1(1)   | 4(1)  | 1(1)   |
| C(18) | 39(1) | 24(1) | 24(1) | -2(1)  | 6(1)  | -3(1)  |
| O(1)  | 81(1) | 34(1) | 26(1) | -10(1) | 18(1) | -20(1) |
| O(2)  | 62(1) | 26(1) | 26(1) | -2(1)  | 14(1) | -9(1)  |
| C(19) | 46(2) | 23(3) | 18(2) | -6(2)  | 4(2)  | -8(2)  |
| O(3)  | 98(2) | 25(1) | 27(1) | -4(1)  | 24(2) | -1(2)  |

|       |         |       |       |       |        |        |
|-------|---------|-------|-------|-------|--------|--------|
| O(4)  | 47(1)   | 29(2) | 20(2) | 4(2)  | 12(1)  | 11(1)  |
| C(29) | 52(3)   | 22(4) | 7(3)  | -3(4) | 12(3)  | -4(4)  |
| O(23) | 57(5)   | 22(4) | 11(4) | -8(3) | 14(3)  | -12(4) |
| O(24) | 68(4)   | 22(3) | 13(3) | -1(2) | 7(3)   | 7(3)   |
| C(20) | 33(1)   | 23(1) | 22(2) | -4(2) | 4(2)   | 2(1)   |
| O(5)  | 50(1)   | 22(1) | 26(1) | -4(1) | 11(1)  | 0(1)   |
| O(6)  | 39(2)   | 23(1) | 26(2) | 0(1)  | 10(1)  | -5(1)  |
| C(40) | 30(3)   | 21(3) | 24(4) | -5(4) | 11(4)  | -4(3)  |
| O(45) | 45(4)   | 37(3) | 33(3) | -9(3) | 6(3)   | -6(3)  |
| O(46) | 41(5)   | 26(4) | 26(4) | -1(3) | 10(4)  | -9(4)  |
| C(21) | 38(1)   | 26(1) | 25(1) | 0(1)  | 8(1)   | -1(1)  |
| O(7)  | 91(1)   | 37(1) | 28(1) | -7(1) | 25(1)  | -23(1) |
| O(8)  | 61(1)   | 33(1) | 30(1) | 1(1)  | 19(1)  | -9(1)  |
| N(1)  | 26(1)   | 22(1) | 23(1) | 0(1)  | 3(1)   | -2(1)  |
| O(29) | 146(12) | 37(9) | 28(8) | 0(8)  | 37(10) | 2(10)  |
| O(9)  | 144(6)  | 40(2) | 38(2) | -5(2) | 37(3)  | -25(3) |
| O(10) | 61(1)   | 23(1) | 39(1) | 1(1)  | 5(1)   | 2(1)   |

---

Table S5. Hydrogen coordinates ( $\times 10^4$ ) and isotropic displacement parameters ( $\text{\AA}^2 \times 10^3$ ) for 231097lt\_auto.

|        | x     | y    | z    | U(eq) |
|--------|-------|------|------|-------|
| H(2)   | 1097  | 6749 | 6718 | 31    |
| H(3)   | -1872 | 7617 | 6902 | 34    |
| H(4)   | -3219 | 8277 | 6127 | 34    |
| H(6)   | 4173  | 5933 | 6461 | 30    |
| H(7)   | 7249  | 5249 | 5842 | 30    |
| H(8)   | 3873  | 6562 | 4805 | 27    |
| H(3A)  | 6962  | 5666 | 4846 | 30    |
| H(9)   | -3856 | 8905 | 5290 | 36    |
| H(10)  | -4778 | 9173 | 4231 | 38    |
| H(11)  | -782  | 7580 | 4307 | 38    |
| H(5A)  | -2913 | 8343 | 3671 | 39    |
| H(39)  | -2199 | 7625 | 4340 | 38    |
| H(30)  | -4194 | 8543 | 3800 | 40    |
| H(31)  | -2797 | 8906 | 5528 | 37    |
| H(35)  | -4486 | 9254 | 4577 | 40    |
| H(13)  | 8347  | 5015 | 3243 | 29    |
| H(16)  | 12782 | 6387 | 2031 | 29    |
| H(24)  | 5933  | 6506 | 3585 | 51    |
| H(5)   | 10105 | 6898 | 3644 | 49    |
| H(7A)  | 10208 | 4805 | 1334 | 77    |
| H(29O) | 9051  | 4983 | 74   | 103   |
| H(29P) | 12062 | 5055 | 352  | 103   |
| H(9O)  | 12003 | 5254 | 136  | 108   |
| H(9P)  | 12072 | 4858 | -250 | 108   |
| H(10O) | -4855 | 7974 | 2847 | 61    |
| H(10P) | -4876 | 8512 | 2735 | 61    |

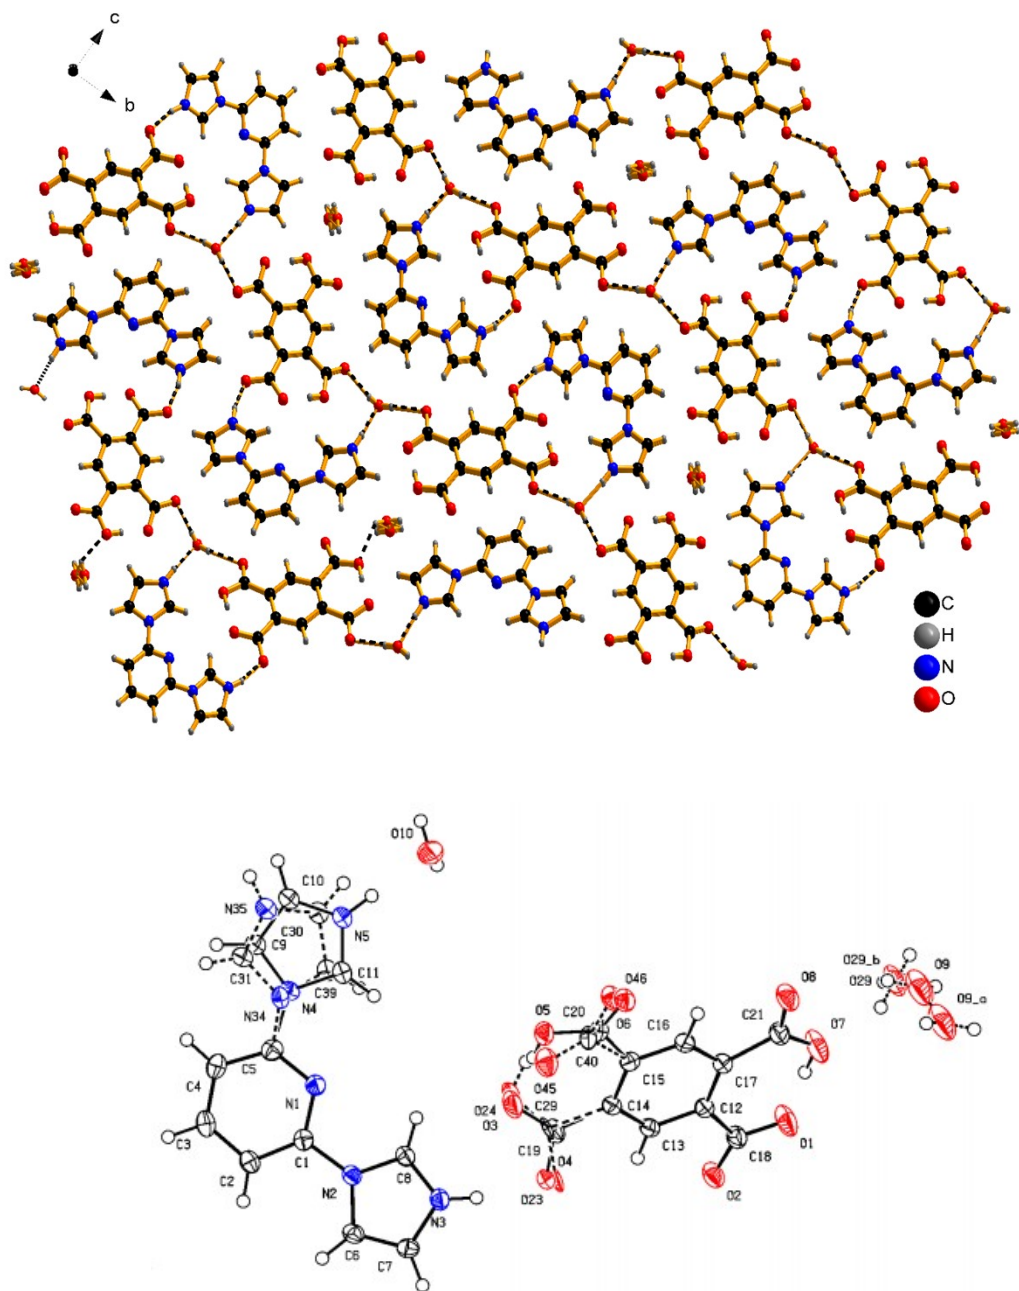

**Figure S1.** Stacked structure of BTC-bimPy@HOF Here, disordered water fills a narrow infinite pore approximately along the a-axis' (b) ORTEP diagram of BTC-bimPy@HOF

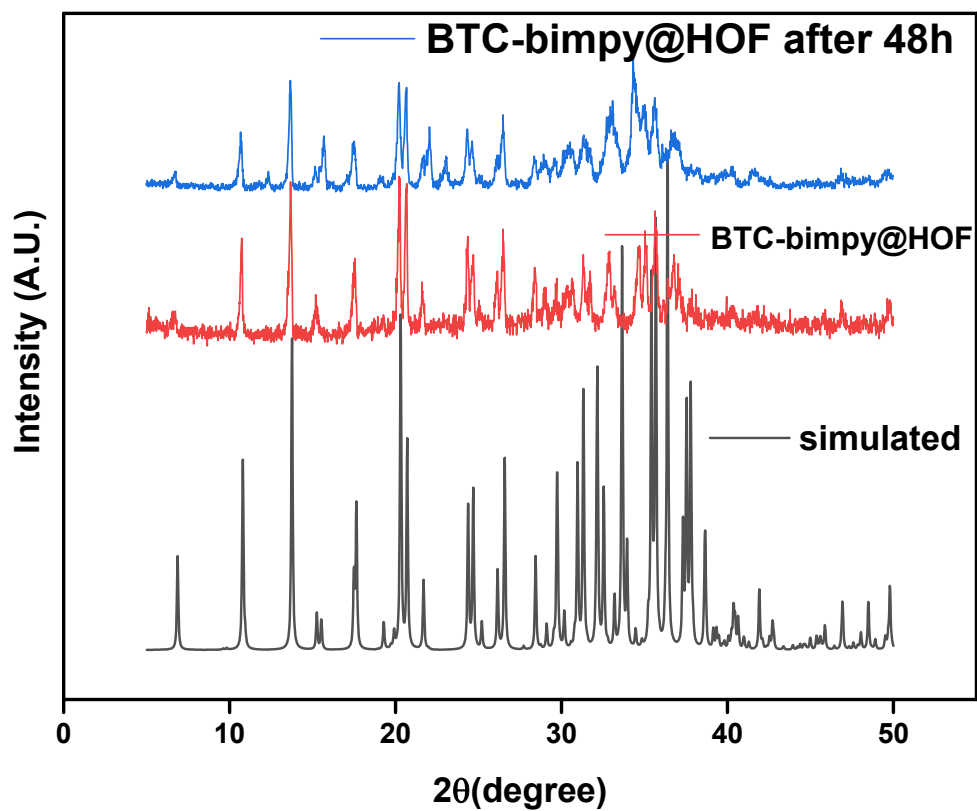

Figure S2: PXRD pattern for BTC-bimpy@HOF before and after recorded at 55 °C at constant relative humidity of 98 % for 48 h.

**Table S6.** Proton Conductivity of HOF-1 at different temperature condition

| <b>Condition</b>   | <b>Conductivity(S.cm<sup>-1</sup>)</b>            |
|--------------------|---------------------------------------------------|
| 40°C, 98%RH        | 4.4x10 <sup>-4</sup>                              |
| 45°C, 98%RH        | 5.9x10 <sup>-4</sup>                              |
| 50°C, 98%RH        | 7.5x10 <sup>-4</sup>                              |
| <b>55°C, 98%RH</b> | <b>9.6x10<sup>-4</sup> (0.96x10<sup>-3</sup>)</b> |
| 60°C, 98%RH        | 5.1x10 <sup>-4</sup>                              |
| 65°C, 98%RH        | 4.1x10 <sup>-4</sup>                              |
| 70°C, 98%RH        | 3.3x10 <sup>-4</sup>                              |
| 75°C, 98%RH        | 1.9x10 <sup>-4</sup>                              |
